# Supplementary material for: Trifluoromethyl Substituted Derivatives of Pyrazoles as Materials for Photovoltaic and Electroluminescent Applications
Source: MDPI journal article supplement (doi:10.3390/cryst12030434), 2022-03-21
Supplement: s1 [file s1]

## Supplementary Materials

Article

# Trifluoromethyl substituted derivatives of pyrazoles as materials for photovoltaic and electroluminescent applications

Monika Pokladko-Kowar<sup>1\*</sup>, Ewa Gondek<sup>1</sup>, Andrzej Danel<sup>1\*</sup>, Tomasz Uchacz<sup>2</sup>, Paweł Szlachcic<sup>3</sup>, Katarzyna Wojtasik<sup>1\*</sup>, Paweł Karasiński<sup>4</sup>

- 1 Department of Physics, Cracow University of Technology, Podchorążych Str.1, 30-084, Kraków, Poland; e.gondek@wp.pl (E.G.); mpokladkokowar@pk.edu.pl (M.P.-K.); rrdanela@cyf-kr.edu.pl (A.D.); katarzyna.wojtasik@pk.edu.pl (K.W.)
  - 2 Faculty of Chemistry, Jagiellonian University, Gronostajowa Str.2, Kraków, 30-387, Poland; uchacz@chemia.uj.edu.pl (T.U.)
  - 3 Faculty of Food Technology, Agricultural University, Balicka Str. 122, Kraków, 31-149, Poland; pawel.szlachcic@urk.edu.pl (P.S.)
  - 4 Department of Optoelectronics, Silesian University of Technology, B. Krzywoustego 2, 44-100 Gliwice, Poland; pawel.karasinski@polsl.pl (P.K.)
- \* Correspondence: mpokladkokowar@pk.edu.pl (M.P.-K.); rrdanela@cyf-kr.edu.pl (A.D.); katarzyna.wojtasik@pk.edu.pl (K.W.)

## Table of contents

|           |        |
|-----------|--------|
| Figure S1 | S2     |
| Figure S2 | S3     |
| Figure S3 | S4     |
| Figure S4 | S5     |
| Table S1  | S5     |
| Figure S5 | S6     |
| Figure S6 | S7-8   |
| Table S2  | S9     |
| Table S3  | S10-11 |

**Figure S1.** Tauc plots prepared for the studied compounds.

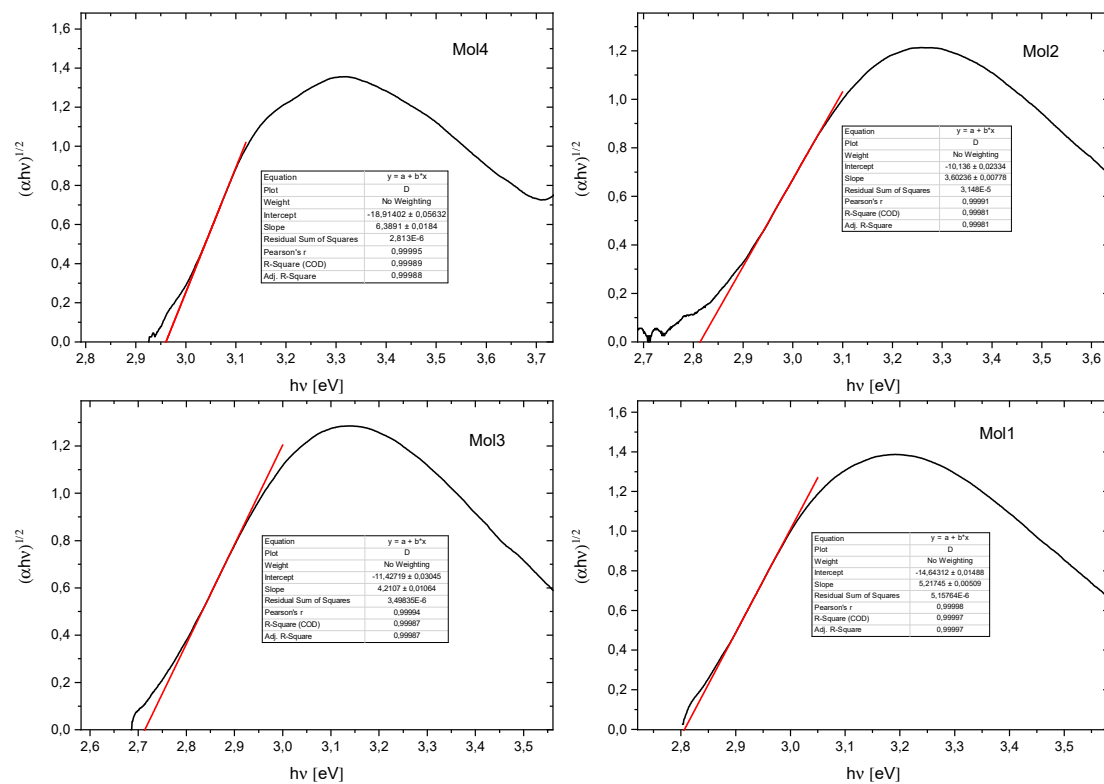

**Figure S2.** Energy changes vs dihedral angle changes of phenyl substituent and the pyrazoloquinoline core for **Mol1** (red) and for **Mol2** (blue).

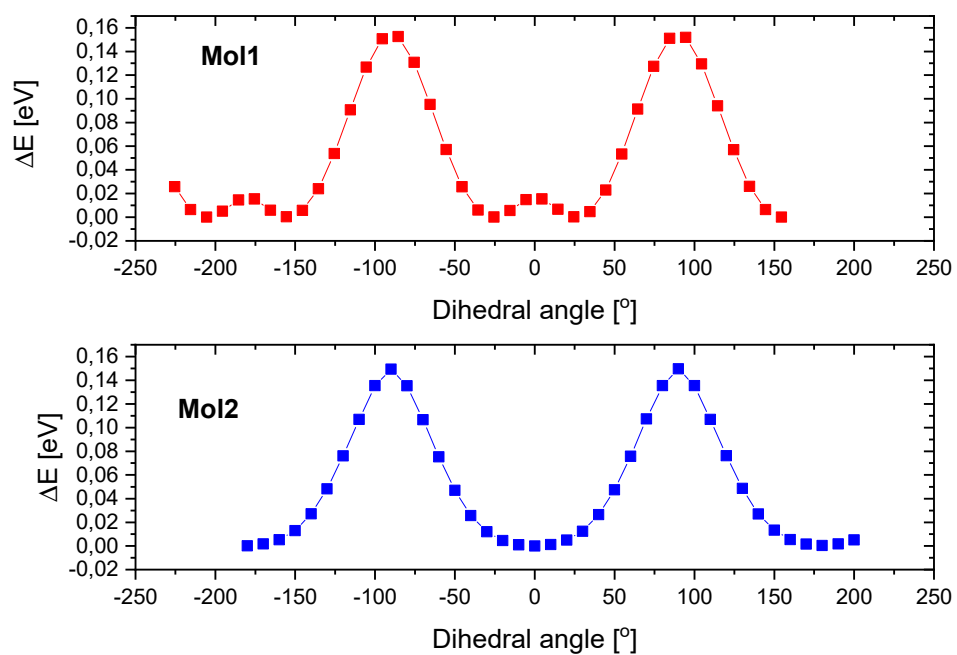

**Figure S3.** Molecular structures of two possible rotamers of **Mol1** (dihedral angle of phenyl substituent and the pyrazoloquinoline core: 24° and 60°) and **Mol2** (dihedral angle of phenyl substituent and the pyrazoloquinoline core: 0° and 60°).

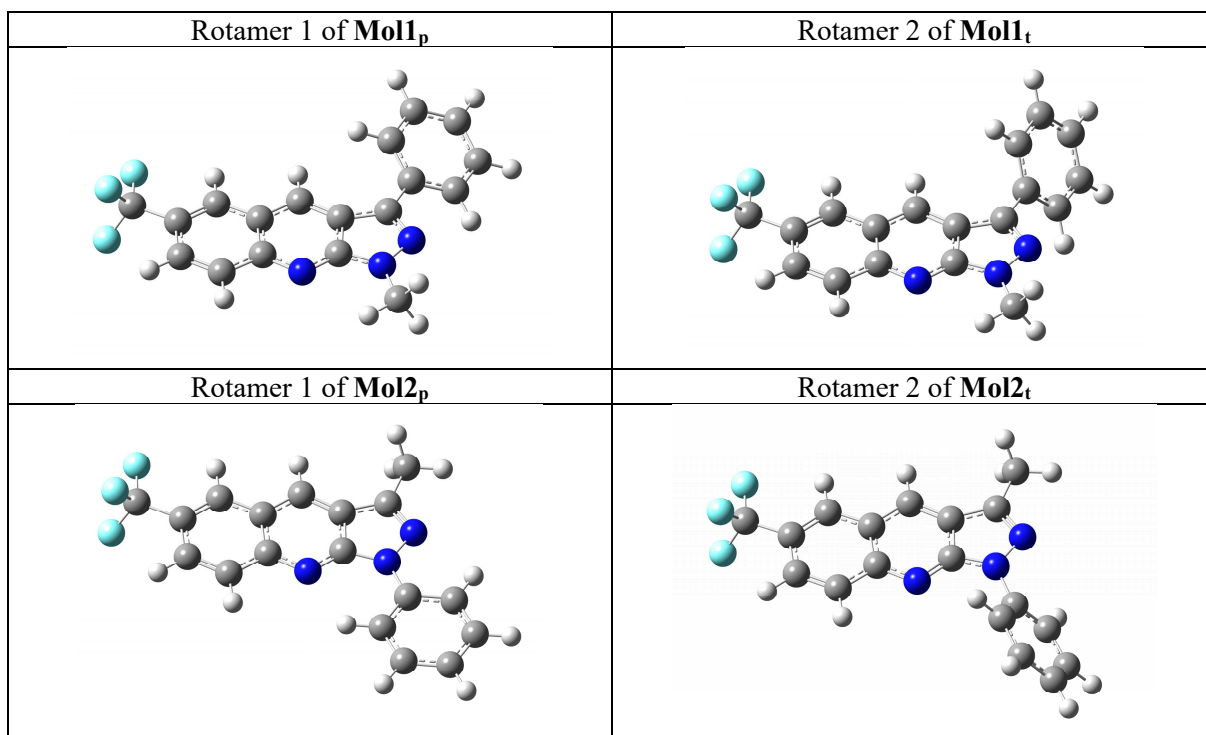

**Figure S4.** Figure S13. Simulated TDDFT (B3LYP/cc-pVDZ with a continuum solvent model for acetonitrile) and averaged UV-vis absorption spectra of **Mol2** and **Mol1**. No spectral shift has been applied. For calculated structures see **Figure S3**. For the excitation assignment see **Table S1**.

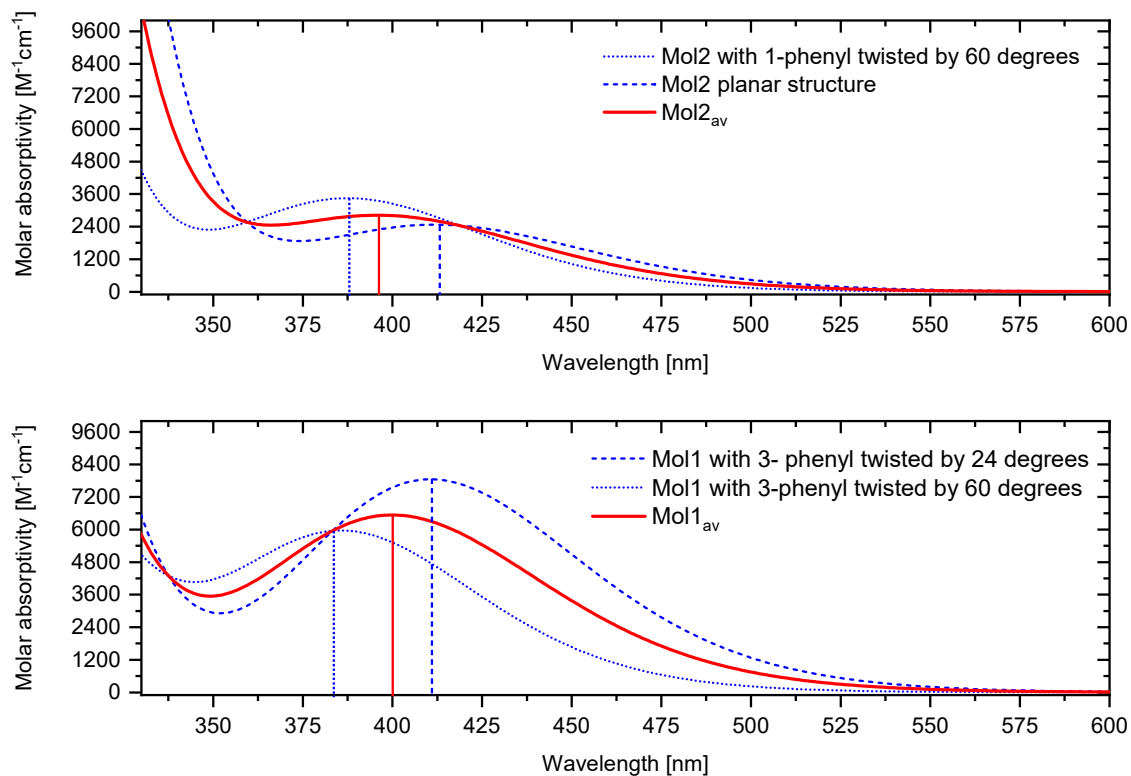

**Table S1.** Lowest-energy excitation and its characteristics calculated (B3LYP/cc-pVDZ with a continuum solvent model for acetonitrile (ACN)) for the studied molecules.

| Compound                | $\lambda/\text{nm}$ | $E/\text{eV}$ | $f$   | $\epsilon [\text{M}^{-1}\text{cm}^{-1}]$ | Contribution | %  |
|-------------------------|---------------------|---------------|-------|------------------------------------------|--------------|----|
| <b>Mol4</b>             | 382                 | 3.24          | 0.099 | 4100                                     | H→L          | 97 |
| <b>Mol1<sub>p</sub></b> | 411                 | 3.02          | 0.194 | 7850                                     | H→L          | 98 |
| <b>Mol1<sub>t</sub></b> | 387                 | 3.21          | 0.146 | 6000                                     | H→L          | 97 |
| <b>Mol2<sub>p</sub></b> | 413                 | 3.01          | 0.096 | 2450                                     | H→L          | 99 |
| <b>Mol2<sub>t</sub></b> | 388                 | 3.19          | 0.085 | 3450                                     | H→L          | 98 |
| <b>Mol3</b>             | 434                 | 2.86          | 0.162 | 6550                                     | H→L          | 99 |

**Figure S5.** Isosurfaces ( $\pm 0.03$  au) of MOs involved in the lowest-energy excitations for the most populated conformers of the studied compounds B3LYP/cc-pVDZ calculations with a continuum solvent model for acetonitrile.

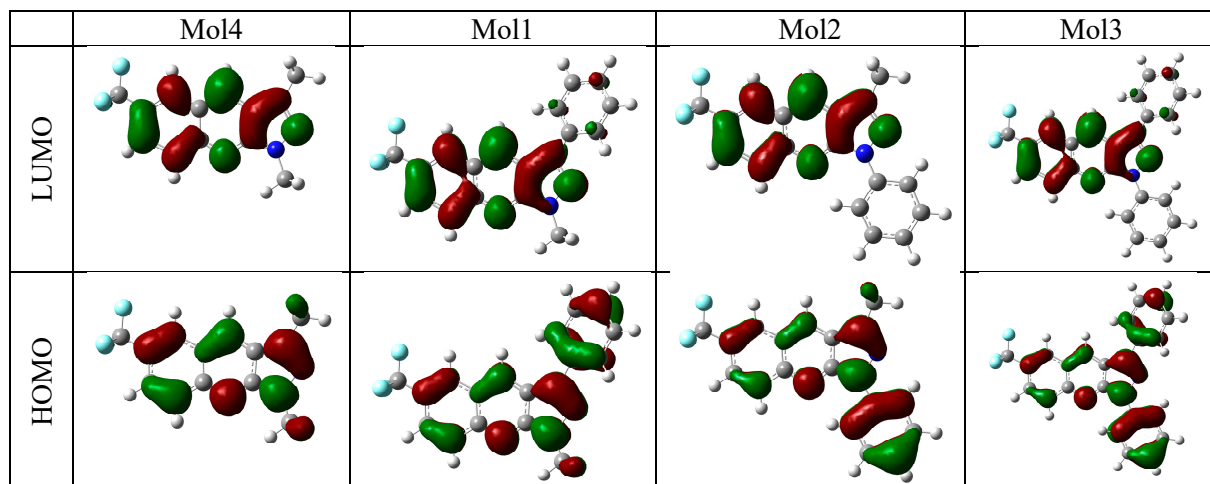

**Figure S6.** Charges located at the atoms of each studied compound.

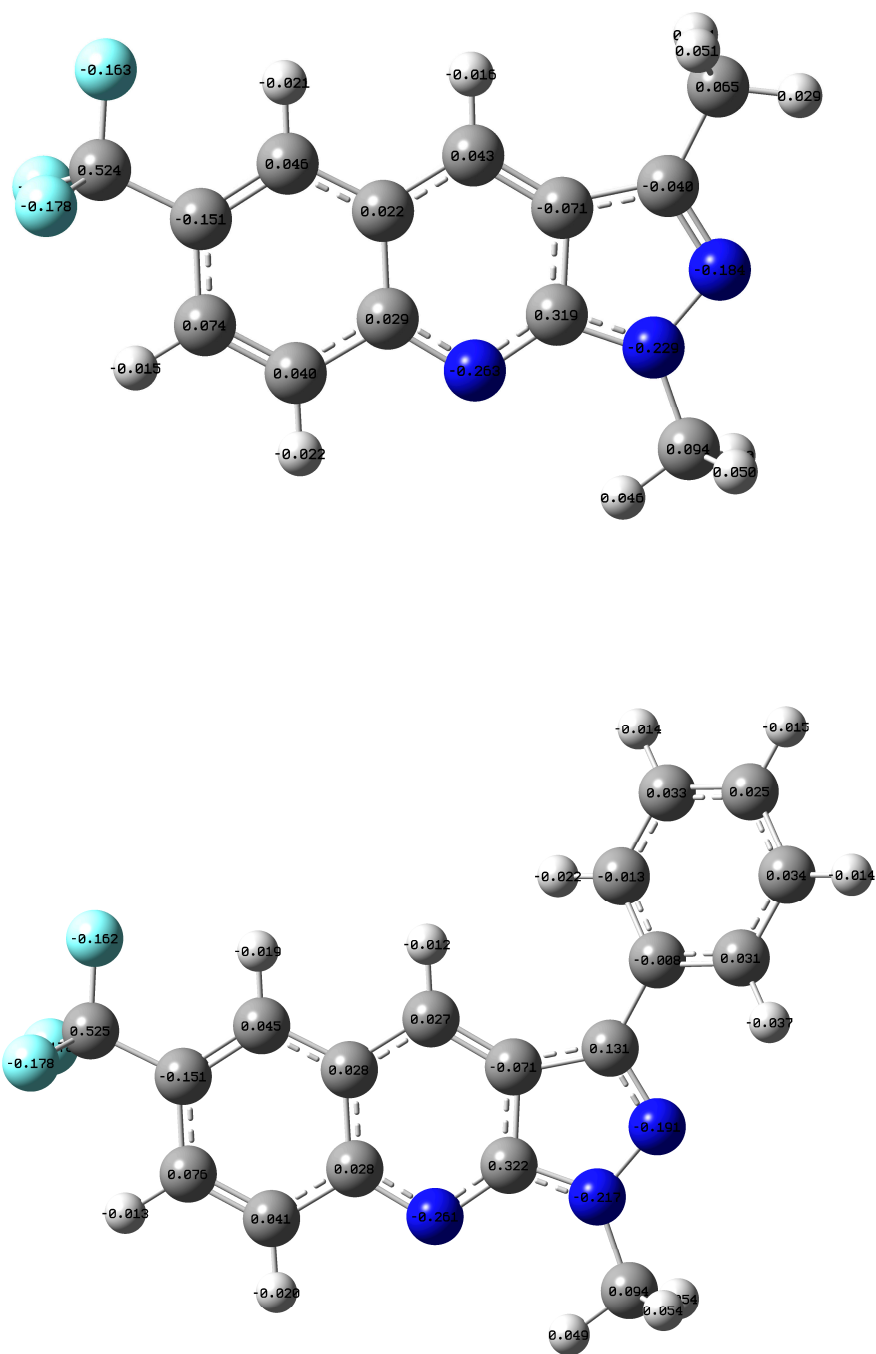

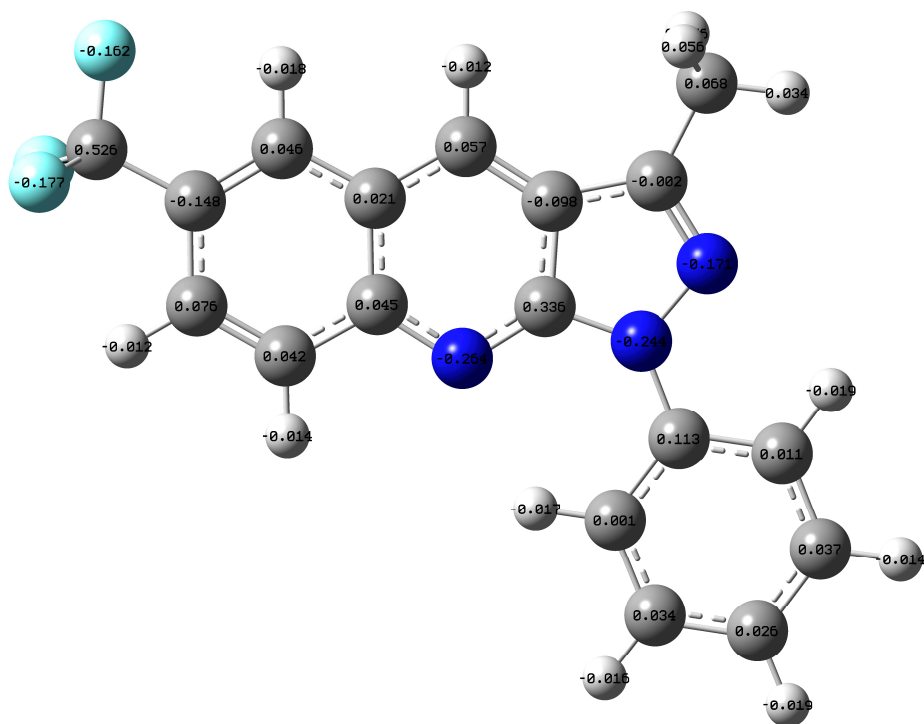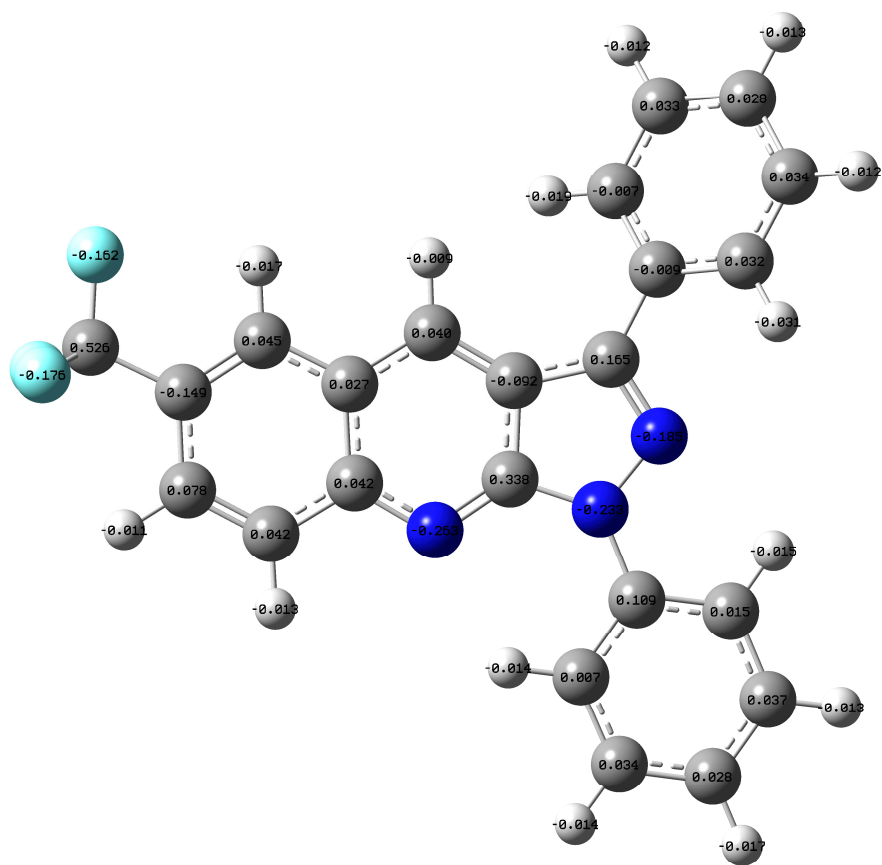



**Table S2.** Oxidation potentials and HOMO/LUMO energy levels of the investigated dyes.  
Energy band gap was evaluated by means of Tauc equation.

| Compound    | E <sub>ox</sub> [V] | HOMO [eV] | Band gap [eV] | LUMO [eV] |
|-------------|---------------------|-----------|---------------|-----------|
| <b>Mol4</b> | 1.268               | -6.375    | 2.960         | -3.415    |
| <b>Mol2</b> | 1.104               | -6.146    | 2,813         | -3.333    |
| <b>Mol1</b> | 1.196               | -6.274    | 2,810         | -3.464    |
| <b>Mol3</b> | 1.093               | -6.130    | 2,713         | -3.417    |

**Table S3.** Optimized (B3LYP/cc-pVDZ with a continuum solvent model for acetonitrile) ground-state geometries of **Mol1**, **Mol2**, **Mol3**, **Mol4** along with the corresponding absolute energies. The atomic symbol followed by three Cartesian coordinates, in Å.

|                                                            |            |            |            |                                                             |            |            |            |
|------------------------------------------------------------|------------|------------|------------|-------------------------------------------------------------|------------|------------|------------|
| <b>Mol4</b><br>E=-965.267931 a.u.<br>G= -965.100907 a.u.   |            |            |            | <b>Mol1</b><br>E= -1157.021298 a.u.<br>G= -1156.805223 a.u. |            |            |            |
| Symbol                                                     | X          | Y          | Z          | Symbol                                                      | X          | Y          | Z          |
| N                                                          | -1.3725640 | -1.5438150 | 0.0000030  | N                                                           | -0.3678810 | 2.3999070  | 0.0649900  |
| C                                                          | -0.1105690 | -1.0418380 | 0.0000040  | C                                                           | -1.3825750 | 1.4993140  | 0.0407310  |
| C                                                          | 0.1857550  | 0.3755040  | 0.0000040  | C                                                           | -1.1715260 | 0.0686750  | 0.0005090  |
| C                                                          | -0.8830210 | 1.3045360  | 0.0000030  | C                                                           | 0.1498440  | -0.4375930 | 0.0010570  |
| C                                                          | -2.1702050 | 0.7990200  | 0.0000020  | C                                                           | 1.1924080  | 0.4738000  | 0.0489640  |
| C                                                          | -2.3314470 | -0.6287320 | 0.0000030  | C                                                           | 0.8450580  | 1.8686430  | 0.0626350  |
| C                                                          | 1.5461410  | 0.7994030  | 0.0000040  | C                                                           | -2.3026810 | -0.7978630 | -0.0382170 |
| C                                                          | 2.5687390  | -0.1208540 | 0.0000050  | C                                                           | -3.5786810 | -0.2852150 | -0.0322100 |
| C                                                          | 2.2831450  | -1.5191180 | 0.0000070  | C                                                           | -3.7926470 | 1.1255370  | 0.0118410  |
| C                                                          | 0.9837310  | -1.9611190 | 0.0000060  | C                                                           | -2.7256650 | 1.9876780  | 0.0466520  |
| C                                                          | -3.5162840 | 1.3154390  | 0.0000010  | C                                                           | 2.6396580  | 0.4669800  | 0.0448260  |
| N                                                          | -4.3818000 | 0.3176960  | 0.0000000  | N                                                           | 3.0923740  | 1.7151500  | 0.0468880  |
| N                                                          | -3.6774610 | -0.8568970 | 0.0000020  | N                                                           | 2.0267310  | 2.5566760  | 0.0570310  |
| H                                                          | -0.6783330 | 2.3776520  | 0.0000020  | C                                                           | 3.5771130  | -0.6689840 | 0.0164840  |
| H                                                          | 1.7635080  | 1.8683440  | 0.0000060  | C                                                           | 4.8740630  | -0.5001310 | -0.5081570 |
| H                                                          | 3.1052880  | -2.2367200 | 0.0000100  | C                                                           | 5.7756070  | -1.5641360 | -0.5329770 |
| H                                                          | 0.7491010  | -3.0267070 | 0.0000080  | C                                                           | 5.4012130  | -2.8196070 | -0.0375690 |
| C                                                          | 4.0041370  | 0.3150360  | -0.0000030 | C                                                           | 4.1188120  | -2.9973160 | 0.4902790  |
| F                                                          | 4.1478850  | 1.6584590  | 0.0000240  | C                                                           | 3.2144430  | -1.9319550 | 0.5205980  |
| F                                                          | 4.6753370  | -0.1541310 | 1.0838410  | H                                                           | 5.1616630  | 0.4756700  | -0.9019660 |
| F                                                          | 4.6753090  | -0.1540820 | -1.0838820 | H                                                           | 6.7753490  | -1.4155240 | -0.9473860 |
| C                                                          | -3.9608160 | 2.7420840  | 0.0000000  | H                                                           | 6.1063620  | -3.6532360 | -0.0619500 |
| H                                                          | -3.5823440 | 3.2765060  | 0.8870070  | H                                                           | 3.8197830  | -3.9690540 | 0.8893300  |
| H                                                          | -3.5823310 | 3.2765100  | -0.8869980 | H                                                           | 2.2303910  | -2.0811480 | 0.9667010  |
| H                                                          | -5.0580400 | 2.7958550  | -0.0000070 | H                                                           | 0.3131260  | -1.5155080 | -0.0436460 |
| C                                                          | -4.3641920 | -2.1325560 | -0.0000120 | H                                                           | -2.1391070 | -1.8756940 | -0.0704740 |
| H                                                          | -3.6022700 | -2.9217290 | 0.0000220  | H                                                           | -4.8117760 | 1.5153960  | 0.0170120  |
| H                                                          | -4.9946700 | -2.2308190 | 0.8967290  | H                                                           | -2.8718230 | 3.0684240  | 0.0786190  |
| H                                                          | -4.9946080 | -2.2308350 | -0.8967950 | C                                                           | -4.7765860 | -1.1881970 | -0.0713720 |
|                                                            |            |            |            | F                                                           | -4.4485540 | -2.4982750 | -0.1019030 |
|                                                            |            |            |            | F                                                           | -5.5811570 | -1.0065000 | 1.0075040  |
|                                                            |            |            |            | F                                                           | -5.5535970 | -0.9494440 | -1.1593640 |
|                                                            |            |            |            | C                                                           | 2.2158510  | 3.9942210  | 0.0856910  |
|                                                            |            |            |            | H                                                           | 1.2236710  | 4.4609040  | 0.0680170  |
|                                                            |            |            |            | H                                                           | 2.7482090  | 4.2933910  | 1.0011040  |
|                                                            |            |            |            | H                                                           | 2.7930980  | 4.3191350  | -0.7924430 |
| <b>Mol2</b><br>E=-1157.021922 a.u.<br>G= -1156.806538 a.u. |            |            |            | <b>Mol3</b><br>E= -1348.774156 a.u.<br>G= -1348.510042 a.u. |            |            |            |

| Symbol | X          | Y          | Z          | Symbol | X          | Y          | Z          |
|--------|------------|------------|------------|--------|------------|------------|------------|
| N      | -0.5499690 | -0.7381370 | -0.0000010 | N      | 0.2192940  | -1.6736640 | 0.0158300  |
| C      | 0.8034920  | -0.5963950 | 0.0000000  | C      | 1.4887180  | -1.1874180 | 0.0139860  |
| C      | 1.4703630  | 0.6848060  | 0.0000020  | C      | 1.7954730  | 0.2228950  | -0.0052950 |
| C      | 0.6864160  | 1.8635010  | 0.0000020  | C      | 0.7325890  | 1.1561350  | -0.0041370 |
| C      | -0.6865860 | 1.7178270  | 0.0000000  | C      | -0.5600310 | 0.6640300  | 0.0240960  |
| C      | -1.2369580 | 0.3929760  | -0.0000020 | C      | -0.7372490 | -0.7606680 | 0.0157570  |
| C      | 2.8939580  | 0.7287080  | 0.0000030  | C      | 3.1582720  | 0.6384600  | -0.0245820 |
| C      | 3.6290270  | -0.4342530 | 0.0000010  | C      | 4.1713030  | -0.2916680 | -0.0183740 |
| C      | 2.9765490  | -1.7022990 | 0.0000000  | C      | 3.8739760  | -1.6867920 | 0.0064570  |
| C      | 1.6053070  | -1.7776770 | 0.0000000  | C      | 2.5708660  | -2.1188050 | 0.0215090  |
| C      | -1.8292990 | 2.5967990  | -0.0000010 | C      | -1.9030650 | 1.2013480  | 0.0156100  |
| N      | -2.9390560 | 1.8943980  | -0.0000010 | N      | -2.7801450 | 0.2148010  | -0.0025750 |
| N      | -2.6113880 | 0.5524850  | 0.0000000  | N      | -2.1049480 | -0.9772950 | -0.0031700 |
| C      | -3.6570680 | -0.4097200 | 0.0000010  | C      | -2.8489180 | -2.1905330 | 0.0230610  |
| C      | -3.3776070 | -1.7871660 | 0.0000010  | C      | -2.2235020 | -3.4297960 | -0.1920310 |
| C      | -4.4329570 | -2.7038480 | 0.0000010  | C      | -2.9882210 | -4.5996290 | -0.1639860 |
| C      | -5.7623200 | -2.2723050 | 0.0000000  | C      | -4.3653870 | -4.5534060 | 0.0697700  |
| C      | -6.0313650 | -0.8992170 | -0.0000010 | C      | -4.9798540 | -3.3142230 | 0.2810420  |
| C      | -4.9920770 | 0.0320790  | 0.0000000  | C      | -4.2329470 | -2.1356070 | 0.2617270  |
| H      | -2.3447310 | -2.1262060 | 0.0000020  | C      | -2.3512080 | 2.6048270  | -0.0052400 |
| H      | -4.2036520 | -3.7719330 | 0.0000020  | C      | -3.5814620 | 2.9431180  | -0.6021420 |
| H      | -6.5795960 | -2.9962960 | 0.0000000  | C      | -4.0217080 | 4.2666570  | -0.6185090 |
| H      | -7.0637160 | -0.5420610 | -0.0000020 | C      | -3.2423470 | 5.2772220  | -0.0417770 |
| H      | -5.1991130 | 1.1001650  | -0.0000010 | C      | -2.0217730 | 4.9513540  | 0.5574200  |
| H      | 1.1651140  | 2.8451440  | 0.0000030  | C      | -1.5786330 | 3.6260880  | 0.5781870  |
| H      | 3.3908570  | 1.6995910  | 0.0000040  | H      | -1.1520210 | -3.4698530 | -0.3699700 |
| H      | 3.5739890  | -2.6153720 | 0.0000000  | H      | -2.4926370 | -5.5584520 | -0.3318480 |
| H      | 1.0940900  | -2.7414250 | -0.0000010 | H      | -4.9544460 | -5.4724950 | 0.0881200  |
| C      | 5.1299030  | -0.4027150 | 0.0000000  | H      | -6.0546680 | -3.2589200 | 0.4674820  |
| F      | 5.6301450  | 0.8518670  | 0.0000130  | H      | -4.7083300 | -1.1711120 | 0.4285110  |
| F      | 5.6472000  | -1.0356780 | 1.0839950  | H      | -4.1818790 | 2.1564770  | -1.0611650 |
| F      | 5.6471970  | -1.0356540 | -1.0840110 | H      | -4.9757490 | 4.5130640  | -1.0898000 |
| C      | -1.8431020 | 4.0899350  | 0.0000000  | H      | -3.5862740 | 6.3136150  | -0.0590760 |
| H      | -1.3241010 | 4.4881640  | 0.8871410  | H      | -1.4118750 | 5.7308140  | 1.0190730  |
| H      | -1.3241100 | 4.4881630  | -0.8871470 | H      | -0.6401520 | 3.3847020  | 1.0789590  |
| H      | -2.8770790 | 4.4598030  | 0.0000050  | H      | 0.9495820  | 2.2248570  | -0.0313610 |
|        |            |            |            | H      | 3.3839190  | 1.7053240  | -0.0419880 |
|        |            |            |            | H      | 4.6900330  | -2.4111040 | 0.0123590  |
|        |            |            |            | H      | 2.3291110  | -3.1824100 | 0.0387440  |
|        |            |            |            | C      | 5.6119240  | 0.1314420  | -0.0366790 |
|        |            |            |            | F      | 5.7661370  | 1.4728640  | -0.0595640 |
|        |            |            |            | F      | 6.2847820  | -0.3268270 | 1.0495380  |
|        |            |            |            | F      | 6.2674220  | -0.3617690 | -1.1181800 |
